# Supplementary material for: Different Functions of Phylogenetically Distinct Bacterial Complex I Isozymes
Source: PubMed Central journal article supplement (PMC4859585; doi:10.1128/jb.01025-15), 2016-03-31
Supplement: JB.01025-15_zjb999094003so1.pdf [file JB.01025-15_zjb999094003so1.pdf]

**Table S1.** Complex I<sub>A</sub> and complex I<sub>E</sub> *nuoA* expression in photoheterotrophically-grown mutant strains

| <b>Strain</b>                                    | <b>Carbon source</b> | <b>DMSO (100mM)</b> | <b>Complex I<sub>A</sub> <i>nuoA</i><sup>a,b</sup> (Relative expression)</b> | <b>Complex I<sub>E</sub> <i>nuoA</i><sup>a,b</sup> (Relative expression)</b> |
|--------------------------------------------------|----------------------|---------------------|------------------------------------------------------------------------------|------------------------------------------------------------------------------|
| Wild type                                        | succinate            | -                   | 1.00 ± 0.5                                                                   | 1.00 ± 0.2                                                                   |
| Δcomplex I <sub>E</sub>                          | succinate            | -                   | 0.97 ± 0.2                                                                   | 0.47 ± 0.5                                                                   |
| Δcomplex I <sub>E</sub>                          | succinate            | +                   | 0.61 ± 0.3                                                                   | 1.11 ± 0.5                                                                   |
| Δcomplex I <sub>A</sub>                          | succinate            | +                   | 0.70 ± 0.6                                                                   | 1.06 ± 0.1                                                                   |
| Δcomplex I <sub>A</sub> /Δcomplex I <sub>E</sub> | succinate            | +                   | 0.72 ± 0.2                                                                   | 1.00 ± 0.1                                                                   |
| Δcomplex I <sub>E</sub>                          | fumarate             | -                   | 0.45 ± 0.4                                                                   | 0.38 ± 0.3                                                                   |
| Δcomplex I <sub>A</sub>                          | fumarate             | -                   | 0.16 ± 0.2                                                                   | 0.29 ± 1.3                                                                   |
| Δcomplex I <sub>E</sub>                          | fumarate             | +                   | 0.36 ± 0.2                                                                   | 0.35 ± 0.4                                                                   |
| Δcomplex I <sub>A</sub>                          | fumarate             | +                   | 0.34 ± 0.5                                                                   | 0.24 ± 0.4                                                                   |
| Δcomplex I <sub>A</sub> /Δcomplex I <sub>E</sub> | fumarate             | +                   | 0.30 ± 0.2                                                                   | 0.25 ± 0.4                                                                   |

*a*: values were averaged from 3 replicates, and show standard error

*b*: transcript levels were normalized using housekeeping gene *rpoZ*

**Table S2:** Predicted metabolic flux for quinol-producing reactions in wild type cells grown photoheterotrophically on different carbon sources

| <b>Carbon source</b> | <b>Lower bound<br/>quinol-producing flux<sup>a</sup></b> | <b>Upper bound<br/>quinol-producing flux<sup>a</sup></b> |
|----------------------|----------------------------------------------------------|----------------------------------------------------------|
| Lactate              | -0.004                                                   | 5.647                                                    |
| Succinate            | 1.721                                                    | 3.647                                                    |
| Fumarate             | -0.004                                                   | 1.647                                                    |
| Malate               | -0.004                                                   | 1.647                                                    |
| Pyruvate             | -0.004                                                   | 2.981                                                    |

*a*: the model provides a predicted range (lower and upper bound) for the metabolic flux of quinol production. A quinol flux that is  $> 0$  represents a condition where more quinol is produced than quinone, and a value  $< 0$  represents a condition where more quinone is produced than quinol, during catabolism of the carbon source. A more negative value indicates a greater capacity for quinone production, while a more positive value indicates a greater capacity for quinol production.

**Table S3.** Gas composition of strains grown photoheterotrophically under nitrogen-fixing conditions in the presence of DMSO

| <b>Strain</b>                                    | <b>Carbon source</b> | <b>Gas composition (% H<sub>2</sub>)<sup>a</sup></b> |
|--------------------------------------------------|----------------------|------------------------------------------------------|
| Wild type                                        | succinate            | 93.1 ± 3                                             |
| Δcomplex I <sub>E</sub>                          | succinate            | 96.6 ± 4                                             |
| Wild type                                        | fumarate             | 92.2 ± 4                                             |
| Δcomplex I <sub>E</sub>                          | fumarate             | 90.5 ± 3                                             |
| Δcomplex I <sub>A</sub>                          | fumarate             | 83.6 ± 8                                             |
| Δcomplex I <sub>A</sub> /Δcomplex I <sub>E</sub> | fumarate             | 84.8 ± 11                                            |

<sup>a</sup>: H<sub>2</sub> composition was measured from 3 replicates, and the value includes standard error.
